# Supplementary material
Source: PubMed Central journal article supplement (PMC4644647)
Supplement: AEM.02752-15_zam999116768so1.pdf [file AEM.02752-15_zam999116768so1.pdf]

**Supplemental Table 1: Distribution of *Listeria monocytogenes* ribotype DUP-1039C isolates among sources according to FoodMicroTracker.org**

|                                            | Prevalence among isolates from |       |                       |
|--------------------------------------------|--------------------------------|-------|-----------------------|
|                                            | Food                           | Human | Animal clinical cases |
| Ribotyped isolates <sup>a</sup>            | 7.8%                           | 9.3%  | 14.4 %                |
| Lineage II ribotyped isolates <sup>b</sup> | 28.3%                          | 36.2% | 30.4%                 |

<sup>a</sup> denominator is the total number of ribotyped isolates in a given source category (e.g., food)

<sup>b</sup> denominator is the total number of ribotyped lineage II isolates in a given source category (e.g., food)

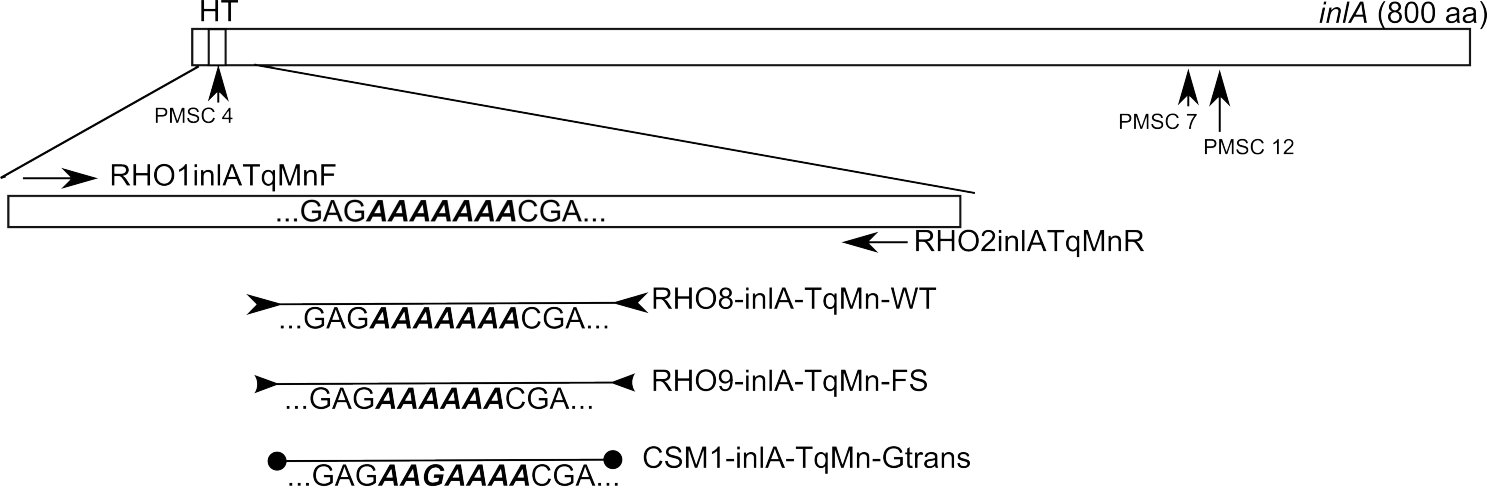

Supplemental Figure 1: Schema of *inlA* with TaqMan primers (horizontal arrows) and probes (double arrowed horizontal lines). The different sequences of each probe matching the three different HT alleles are shown.
